# Supplementary material for: Declining amenable mortality: a reflection of health care systems?
Source: Springer Nature journal article supplement (doi:10.1186/s12913-017-2708-z), 2017-11-15
Supplement: MOESM1 [file 12913_2017_2708_MOESM1_ESM.pdf]

## List of 22 European OECD countries

| Country              | Years                   | Cause of death classification            | Population data source                   |
|----------------------|-------------------------|------------------------------------------|------------------------------------------|
| Austria (AUT)        | 2000-2014               | ICD-9 (2000-2001),<br>ICD-10 (2002-2014) | WHO                                      |
| Belgium (BEL)        | 2000-2012               | ICD-10                                   | WHO                                      |
| Czech Republic (CZE) | 2000-2013               | ICD-10                                   | WHO                                      |
| Denmark (DNK)        | 2000-2012               | ICD-10                                   | WHO                                      |
| Estonia (EST)        | 2000-2012               | ICD-10                                   | WHO                                      |
| Finland (FIN)        | 2000-2013               | ICD-10                                   | WHO                                      |
| France (FRA)         | 2000-2011               | ICD-10                                   | WHO                                      |
| Germany (DEU)        | 2000-2013               | ICD-10                                   | WHO                                      |
| Hungary (HUN)        | 2000-2013               | ICD-10                                   | WHO                                      |
| Iceland (ISL)        | 2000-2009               | ICD-10                                   | WHO                                      |
| Ireland (IRL)        | 2000-2012               | ICD-9 (2000-2006),<br>ICD-10 (2007-2012) | WHO (2000-2009, 2011-2012),<br>UN (2010) |
| Italy (ITA)          | 2000-2003,<br>2006-2012 | ICD-9 (2000-2002),<br>ICD-10 (2003-2012) | WHO                                      |
| Luxembourg (LUX)     | 2000-2013               | ICD-10                                   | WHO                                      |
| Netherlands (NDL)    | 2000-2013               | ICD-10                                   | WHO                                      |
| Norway (NOR)         | 2000-2013               | ICD-10                                   | WHO                                      |
| Poland (POL)         | 2000-2013               | ICD-10                                   | WHO                                      |
| Portugal (PRT)       | 2000-2003,<br>2007-2013 | ICD-9 (2000-2001),<br>ICD-10 (2002-2013) | WHO                                      |
| Slovakia (SVK)       | 2000-2010               | ICD-10                                   | WHO                                      |
| Slovenia (SVN)       | 2000-2010               | ICD-10                                   | WHO                                      |
| Spain (ESP)          | 2000-2013               | ICD-10                                   | WHO                                      |
| Sweden (SWE)         | 2000-2013               | ICD-10                                   | WHO                                      |
| United Kingdom (GBR) | 2001-2013               | ICD-10                                   | WHO                                      |

Abbreviations: WHO, World Health Organization; UN, United Nations.
