# Supplementary material for: Declining amenable mortality: a reflection of health care systems?
Source: Springer Nature journal article supplement (doi:10.1186/s12913-017-2708-z), 2017-11-15
Supplement: MOESM3 [file 15227118]

## Böhm's health care system classification: a summary

| Dimensions                                                                    | Taxonomy                                                                                                                                                                                                                                                                                                                                                                                                                                                                                                                                                                                                                                                                                                                                                                                                                                                                                                                                                                                                                                                                                                                                                                                    | Classification mode of healthcare systems                                     |                                                                                                                                                                                                                                                                                       |                                     |                                                                                                                                                                                                                                                                                                                                                                                                                                                                                                                                                                                                                                                                                                                                                       |              |                                                                                                                                                                                                                                                                            |                                                                                                                                                                                                                                                                                                                                                                                                                                                                                                                                                                                                                                                                                          |
|-------------------------------------------------------------------------------|---------------------------------------------------------------------------------------------------------------------------------------------------------------------------------------------------------------------------------------------------------------------------------------------------------------------------------------------------------------------------------------------------------------------------------------------------------------------------------------------------------------------------------------------------------------------------------------------------------------------------------------------------------------------------------------------------------------------------------------------------------------------------------------------------------------------------------------------------------------------------------------------------------------------------------------------------------------------------------------------------------------------------------------------------------------------------------------------------------------------------------------------------------------------------------------------|-------------------------------------------------------------------------------|---------------------------------------------------------------------------------------------------------------------------------------------------------------------------------------------------------------------------------------------------------------------------------------|-------------------------------------|-------------------------------------------------------------------------------------------------------------------------------------------------------------------------------------------------------------------------------------------------------------------------------------------------------------------------------------------------------------------------------------------------------------------------------------------------------------------------------------------------------------------------------------------------------------------------------------------------------------------------------------------------------------------------------------------------------------------------------------------------------|--------------|----------------------------------------------------------------------------------------------------------------------------------------------------------------------------------------------------------------------------------------------------------------------------|------------------------------------------------------------------------------------------------------------------------------------------------------------------------------------------------------------------------------------------------------------------------------------------------------------------------------------------------------------------------------------------------------------------------------------------------------------------------------------------------------------------------------------------------------------------------------------------------------------------------------------------------------------------------------------------|
| Financing                                                                     | <table border="1"> <tr> <td><b>Private:</b> contributions to private insurance and out of pocket payments</td> </tr> <tr> <td><b>Societal:</b> social security funds</td> </tr> <tr> <td><b>State :</b> general tax revenues</td> </tr> </table>                                                                                                                                                                                                                                                                                                                                                                                                                                                                                                                                                                                                                                                                                                                                                                                                                                                                                                                                            | <b>Private:</b> contributions to private insurance and out of pocket payments | <b>Societal:</b> social security funds                                                                                                                                                                                                                                                | <b>State :</b> general tax revenues | <p>The highest share determines in which group the respective country is classified.</p>                                                                                                                                                                                                                                                                                                                                                                                                                                                                                                                                                                                                                                                              |              |                                                                                                                                                                                                                                                                            |                                                                                                                                                                                                                                                                                                                                                                                                                                                                                                                                                                                                                                                                                          |
| <b>Private:</b> contributions to private insurance and out of pocket payments |                                                                                                                                                                                                                                                                                                                                                                                                                                                                                                                                                                                                                                                                                                                                                                                                                                                                                                                                                                                                                                                                                                                                                                                             |                                                                               |                                                                                                                                                                                                                                                                                       |                                     |                                                                                                                                                                                                                                                                                                                                                                                                                                                                                                                                                                                                                                                                                                                                                       |              |                                                                                                                                                                                                                                                                            |                                                                                                                                                                                                                                                                                                                                                                                                                                                                                                                                                                                                                                                                                          |
| <b>Societal:</b> social security funds                                        |                                                                                                                                                                                                                                                                                                                                                                                                                                                                                                                                                                                                                                                                                                                                                                                                                                                                                                                                                                                                                                                                                                                                                                                             |                                                                               |                                                                                                                                                                                                                                                                                       |                                     |                                                                                                                                                                                                                                                                                                                                                                                                                                                                                                                                                                                                                                                                                                                                                       |              |                                                                                                                                                                                                                                                                            |                                                                                                                                                                                                                                                                                                                                                                                                                                                                                                                                                                                                                                                                                          |
| <b>State :</b> general tax revenues                                           |                                                                                                                                                                                                                                                                                                                                                                                                                                                                                                                                                                                                                                                                                                                                                                                                                                                                                                                                                                                                                                                                                                                                                                                             |                                                                               |                                                                                                                                                                                                                                                                                       |                                     |                                                                                                                                                                                                                                                                                                                                                                                                                                                                                                                                                                                                                                                                                                                                                       |              |                                                                                                                                                                                                                                                                            |                                                                                                                                                                                                                                                                                                                                                                                                                                                                                                                                                                                                                                                                                          |
| Regulation                                                                    | <table border="1"> <tr> <td data-bbox="323 477 395 613"><b>Private</b></td> <td data-bbox="411 477 783 613"> <p>According to actors responsible for regulating the object in question.<br/>The objects are:<br/><b>Relations between (potential) beneficiaries and financing agencies :</b><br/>(1) <i>System of financing:</i> the financing of health care by public and /or private sources</p> </td> </tr> <tr> <td data-bbox="323 618 395 745"><b>Societal</b></td> <td data-bbox="411 618 783 745"> <p><b>Relations between financing agencies and service providers:</b><br/>(2) <i>Remuneration of service providers :</i> the specific system of provider compensation<br/>(3) <i>Access of (potential) providers to health care markets:</i> access to financing agencies</p> </td> </tr> <tr> <td data-bbox="323 750 395 878"><b>State</b></td> <td data-bbox="411 750 783 878"> <p><b>Relations between service providers and (potential) beneficiaries:</b><br/>(4) <i>Access of patients to service providers:</i> the specific delivery of care to patients<br/>(5) <i>Benefit package :</i> the content and range of services offered to patients.</p> </td> </tr> </table> | <b>Private</b>                                                                | <p>According to actors responsible for regulating the object in question.<br/>The objects are:<br/><b>Relations between (potential) beneficiaries and financing agencies :</b><br/>(1) <i>System of financing:</i> the financing of health care by public and /or private sources</p> | <b>Societal</b>                     | <p><b>Relations between financing agencies and service providers:</b><br/>(2) <i>Remuneration of service providers :</i> the specific system of provider compensation<br/>(3) <i>Access of (potential) providers to health care markets:</i> access to financing agencies</p>                                                                                                                                                                                                                                                                                                                                                                                                                                                                         | <b>State</b> | <p><b>Relations between service providers and (potential) beneficiaries:</b><br/>(4) <i>Access of patients to service providers:</i> the specific delivery of care to patients<br/>(5) <i>Benefit package :</i> the content and range of services offered to patients.</p> | <p>Each object of regulation according to the actor responsible for regulating the field in question is classified.<br/>As regulatory actors often differ between inpatient and outpatient sectors, both sectors separately for the regulatory fields (2)–(4) is classified.<br/>After having classified each of the five categories, all of them are summarized and create one point if the whole category is defined as state, societal, or private, respectively, half a point if two different actors are relevant in one category, and one third of a point if all three actors are involved in regulation. The actor dominating the most categories determines classification.</p> |
| <b>Private</b>                                                                | <p>According to actors responsible for regulating the object in question.<br/>The objects are:<br/><b>Relations between (potential) beneficiaries and financing agencies :</b><br/>(1) <i>System of financing:</i> the financing of health care by public and /or private sources</p>                                                                                                                                                                                                                                                                                                                                                                                                                                                                                                                                                                                                                                                                                                                                                                                                                                                                                                       |                                                                               |                                                                                                                                                                                                                                                                                       |                                     |                                                                                                                                                                                                                                                                                                                                                                                                                                                                                                                                                                                                                                                                                                                                                       |              |                                                                                                                                                                                                                                                                            |                                                                                                                                                                                                                                                                                                                                                                                                                                                                                                                                                                                                                                                                                          |
| <b>Societal</b>                                                               | <p><b>Relations between financing agencies and service providers:</b><br/>(2) <i>Remuneration of service providers :</i> the specific system of provider compensation<br/>(3) <i>Access of (potential) providers to health care markets:</i> access to financing agencies</p>                                                                                                                                                                                                                                                                                                                                                                                                                                                                                                                                                                                                                                                                                                                                                                                                                                                                                                               |                                                                               |                                                                                                                                                                                                                                                                                       |                                     |                                                                                                                                                                                                                                                                                                                                                                                                                                                                                                                                                                                                                                                                                                                                                       |              |                                                                                                                                                                                                                                                                            |                                                                                                                                                                                                                                                                                                                                                                                                                                                                                                                                                                                                                                                                                          |
| <b>State</b>                                                                  | <p><b>Relations between service providers and (potential) beneficiaries:</b><br/>(4) <i>Access of patients to service providers:</i> the specific delivery of care to patients<br/>(5) <i>Benefit package :</i> the content and range of services offered to patients.</p>                                                                                                                                                                                                                                                                                                                                                                                                                                                                                                                                                                                                                                                                                                                                                                                                                                                                                                                  |                                                                               |                                                                                                                                                                                                                                                                                       |                                     |                                                                                                                                                                                                                                                                                                                                                                                                                                                                                                                                                                                                                                                                                                                                                       |              |                                                                                                                                                                                                                                                                            |                                                                                                                                                                                                                                                                                                                                                                                                                                                                                                                                                                                                                                                                                          |
| Service Provision                                                             | <table border="1"> <tr> <td><b>Private:</b> private for profit actors</td> </tr> <tr> <td><b>Societal:</b> private not for profit actors</td> </tr> <tr> <td><b>State :</b> public actors</td> </tr> </table>                                                                                                                                                                                                                                                                                                                                                                                                                                                                                                                                                                                                                                                                                                                                                                                                                                                                                                                                                                               | <b>Private:</b> private for profit actors                                     | <b>Societal:</b> private not for profit actors                                                                                                                                                                                                                                        | <b>State :</b> public actors        | <p>A trichotomous service provision index is used.<br/>Steps to constructing this index:<br/>The first is to allocate weights to the main health care sectors (inpatient care, outpatient care, pharmaceuticals) according to the financial resources allocated to each sector.<br/>The second is to identify the shares of the dominant providers within each sector.<br/>The third is to multiply the standardized share of total health spending of the selected sectors with the relative shares of private, societal, and state actors in each sector, and then sum up the received shares of private, societal, and public provision.<br/>Decisive for the classification is which actor provides the relatively highest share of services.</p> |              |                                                                                                                                                                                                                                                                            |                                                                                                                                                                                                                                                                                                                                                                                                                                                                                                                                                                                                                                                                                          |
| <b>Private:</b> private for profit actors                                     |                                                                                                                                                                                                                                                                                                                                                                                                                                                                                                                                                                                                                                                                                                                                                                                                                                                                                                                                                                                                                                                                                                                                                                                             |                                                                               |                                                                                                                                                                                                                                                                                       |                                     |                                                                                                                                                                                                                                                                                                                                                                                                                                                                                                                                                                                                                                                                                                                                                       |              |                                                                                                                                                                                                                                                                            |                                                                                                                                                                                                                                                                                                                                                                                                                                                                                                                                                                                                                                                                                          |
| <b>Societal:</b> private not for profit actors                                |                                                                                                                                                                                                                                                                                                                                                                                                                                                                                                                                                                                                                                                                                                                                                                                                                                                                                                                                                                                                                                                                                                                                                                                             |                                                                               |                                                                                                                                                                                                                                                                                       |                                     |                                                                                                                                                                                                                                                                                                                                                                                                                                                                                                                                                                                                                                                                                                                                                       |              |                                                                                                                                                                                                                                                                            |                                                                                                                                                                                                                                                                                                                                                                                                                                                                                                                                                                                                                                                                                          |
| <b>State :</b> public actors                                                  |                                                                                                                                                                                                                                                                                                                                                                                                                                                                                                                                                                                                                                                                                                                                                                                                                                                                                                                                                                                                                                                                                                                                                                                             |                                                                               |                                                                                                                                                                                                                                                                                       |                                     |                                                                                                                                                                                                                                                                                                                                                                                                                                                                                                                                                                                                                                                                                                                                                       |              |                                                                                                                                                                                                                                                                            |                                                                                                                                                                                                                                                                                                                                                                                                                                                                                                                                                                                                                                                                                          |
