# Supplementary material for: Declining amenable mortality: a reflection of health care systems?
Source: BMC Health Serv Res. 2017 Nov 15;17:735. doi: 10.1186/s12913-017-2708-z (PMC5688697; doi:10.1186/s12913-017-2708-z)
Supplement: Supplementary file 4 — Primary data analyzed for this study. (XLS 46 kb) [file 12913_2017_2708_MOESM4_ESM.xls]

## Sheet: Dataset
country	year	SDR	regulation	financing	provision
AUT	2000	104	Societal	Societal	Private
AUT	2001	100	Societal	Societal	Private
AUT	2002	94	Societal	Societal	Private
AUT	2003	88	Societal	Societal	Private
AUT	2004	81	Societal	Societal	Private
AUT	2005	79	Societal	Societal	Private
AUT	2006	76	Societal	Societal	Private
AUT	2007	73	Societal	Societal	Private
AUT	2008	68	Societal	Societal	Private
AUT	2009	69	Societal	Societal	Private
AUT	2010	67	Societal	Societal	Private
AUT	2011	64	Societal	Societal	Private
AUT	2012	62	Societal	Societal	Private
AUT	2013	62	Societal	Societal	Private
AUT	2014	61	Societal	Societal	Private
BEL	2000	98	Statal	Societal	Private
BEL	2001	91	Statal	Societal	Private
BEL	2002	91	Statal	Societal	Private
BEL	2003	87	Statal	Societal	Private
BEL	2004	84	Statal	Societal	Private
BEL	2005	83	Statal	Societal	Private
BEL	2006	77	Statal	Societal	Private
BEL	2007	76	Statal	Societal	Private
BEL	2008	75	Statal	Societal	Private
BEL	2009	71	Statal	Societal	Private
BEL	2010	68	Statal	Societal	Private
BEL	2011	65	Statal	Societal	Private
BEL	2012	64	Statal	Societal	Private
CZE	2000	176	Statal	Societal	Private
CZE	2001	167	Statal	Societal	Private
CZE	2002	165	Statal	Societal	Private
CZE	2003	160	Statal	Societal	Private
CZE	2004	150	Statal	Societal	Private
CZE	2005	144	Statal	Societal	Private
CZE	2006	137	Statal	Societal	Private
CZE	2007	132	Statal	Societal	Private
CZE	2008	126	Statal	Societal	Private
CZE	2009	124	Statal	Societal	Private
CZE	2010	120	Statal	Societal	Private
CZE	2011	113	Statal	Societal	Private
CZE	2012	111	Statal	Societal	Private
CZE	2013	111	Statal	Societal	Private
DNK	2000	111	Statal	Statal	Statal
DNK	2001	109	Statal	Statal	Statal
DNK	2002	111	Statal	Statal	Statal
DNK	2003	106	Statal	Statal	Statal
DNK	2004	103	Statal	Statal	Statal
DNK	2005	94	Statal	Statal	Statal
DNK	2006	91	Statal	Statal	Statal
DNK	2007	87	Statal	Statal	Statal
DNK	2008	82	Statal	Statal	Statal
DNK	2009	79	Statal	Statal	Statal
DNK	2010	77	Statal	Statal	Statal
DNK	2011	71	Statal	Statal	Statal
DNK	2012	67	Statal	Statal	Statal
EST	2000	277	Statal	Societal	Private
EST	2001	266	Statal	Societal	Private
EST	2002	255	Statal	Societal	Private
EST	2003	243	Statal	Societal	Private
EST	2004	232	Statal	Societal	Private
EST	2005	210	Statal	Societal	Private
EST	2006	204	Statal	Societal	Private
EST	2007	197	Statal	Societal	Private
EST	2008	184	Statal	Societal	Private
EST	2009	179	Statal	Societal	Private
EST	2010	164	Statal	Societal	Private
EST	2011	154	Statal	Societal	Private
EST	2012	151	Statal	Societal	Private
FIN	2000	116	Statal	Statal	Statal
FIN	2001	107	Statal	Statal	Statal
FIN	2002	104	Statal	Statal	Statal
FIN	2003	99	Statal	Statal	Statal
FIN	2004	96	Statal	Statal	Statal
FIN	2005	91	Statal	Statal	Statal
FIN	2006	85	Statal	Statal	Statal
FIN	2007	83	Statal	Statal	Statal
FIN	2008	79	Statal	Statal	Statal
FIN	2009	79	Statal	Statal	Statal
FIN	2010	76	Statal	Statal	Statal
FIN	2011	72	Statal	Statal	Statal
FIN	2012	70	Statal	Statal	Statal
FIN	2013	67	Statal	Statal	Statal
FRA	2000	75	Statal	Societal	Private
FRA	2001	73	Statal	Societal	Private
FRA	2002	71	Statal	Societal	Private
FRA	2003	70	Statal	Societal	Private
FRA	2004	65	Statal	Societal	Private
FRA	2005	64	Statal	Societal	Private
FRA	2006	61	Statal	Societal	Private
FRA	2007	60	Statal	Societal	Private
FRA	2008	59	Statal	Societal	Private
FRA	2009	57	Statal	Societal	Private
FRA	2010	55	Statal	Societal	Private
FRA	2011	53	Statal	Societal	Private
DEU	2000	106	Societal	Societal	Private
DEU	2001	103	Societal	Societal	Private
DEU	2002	101	Societal	Societal	Private
DEU	2003	98	Societal	Societal	Private
DEU	2004	93	Societal	Societal	Private
DEU	2005	89	Societal	Societal	Private
DEU	2006	85	Societal	Societal	Private
DEU	2007	83	Societal	Societal	Private
DEU	2008	79	Societal	Societal	Private
DEU	2009	77	Societal	Societal	Private
DEU	2010	75	Societal	Societal	Private
DEU	2011	73	Societal	Societal	Private
DEU	2012	71	Societal	Societal	Private
DEU	2013	71	Societal	Societal	Private
HUN	2000	246	Statal	Societal	Private
HUN	2001	224	Statal	Societal	Private
HUN	2002	220	Statal	Societal	Private
HUN	2003	222	Statal	Societal	Private
HUN	2004	212	Statal	Societal	Private
HUN	2005	207	Statal	Societal	Private
HUN	2006	198	Statal	Societal	Private
HUN	2007	192	Statal	Societal	Private
HUN	2008	186	Statal	Societal	Private
HUN	2009	185	Statal	Societal	Private
HUN	2010	178	Statal	Societal	Private
HUN	2011	173	Statal	Societal	Private
HUN	2012	167	Statal	Societal	Private
HUN	2013	161	Statal	Societal	Private
ISL	2000	82	Statal	Statal	Statal
ISL	2001	82	Statal	Statal	Statal
ISL	2002	69	Statal	Statal	Statal
ISL	2003	78	Statal	Statal	Statal
ISL	2004	72	Statal	Statal	Statal
ISL	2005	61	Statal	Statal	Statal
ISL	2006	67	Statal	Statal	Statal
ISL	2007	64	Statal	Statal	Statal
ISL	2008	65	Statal	Statal	Statal
ISL	2009	53	Statal	Statal	Statal
IRL	2000	138	Statal	Statal	Private
IRL	2001	126	Statal	Statal	Private
IRL	2002	116	Statal	Statal	Private
IRL	2003	109	Statal	Statal	Private
IRL	2004	106	Statal	Statal	Private
IRL	2005	99	Statal	Statal	Private
IRL	2006	92	Statal	Statal	Private
IRL	2007	87	Statal	Statal	Private
IRL	2008	89	Statal	Statal	Private
IRL	2009	86	Statal	Statal	Private
IRL	2010	76	Statal	Statal	Private
IRL	2011	75	Statal	Statal	Private
IRL	2012	71	Statal	Statal	Private
ITA	2000	86	Statal	Statal	Private
ITA	2001	82	Statal	Statal	Private
ITA	2002	80	Statal	Statal	Private
ITA	2003	79	Statal	Statal	Private
ITA	2006	68	Statal	Statal	Private
ITA	2007	67	Statal	Statal	Private
ITA	2008	66	Statal	Statal	Private
ITA	2009	64	Statal	Statal	Private
ITA	2010	62	Statal	Statal	Private
ITA	2011	62	Statal	Statal	Private
ITA	2012	61	Statal	Statal	Private
LUX	2000	91	Societal	Societal	Private
LUX	2001	89	Societal	Societal	Private
LUX	2002	94	Societal	Societal	Private
LUX	2003	93	Societal	Societal	Private
LUX	2004	74	Societal	Societal	Private
LUX	2005	75	Societal	Societal	Private
LUX	2006	80	Societal	Societal	Private
LUX	2007	72	Societal	Societal	Private
LUX	2008	65	Societal	Societal	Private
LUX	2009	64	Societal	Societal	Private
LUX	2010	66	Societal	Societal	Private
LUX	2011	60	Societal	Societal	Private
LUX	2012	56	Societal	Societal	Private
LUX	2013	64	Societal	Societal	Private
NDL	2000	99	Statal	Societal	Private
NDL	2001	94	Statal	Societal	Private
NDL	2002	92	Statal	Societal	Private
NDL	2003	88	Statal	Societal	Private
NDL	2004	82	Statal	Societal	Private
NDL	2005	80	Statal	Societal	Private
NDL	2006	75	Statal	Societal	Private
NDL	2007	72	Statal	Societal	Private
NDL	2008	70	Statal	Societal	Private
NDL	2009	67	Statal	Societal	Private
NDL	2010	65	Statal	Societal	Private
NDL	2011	62	Statal	Societal	Private
NDL	2012	62	Statal	Societal	Private
NDL	2013	59	Statal	Societal	Private
NOR	2000	94	Statal	Statal	Statal
NOR	2001	91	Statal	Statal	Statal
NOR	2002	91	Statal	Statal	Statal
NOR	2003	83	Statal	Statal	Statal
NOR	2004	76	Statal	Statal	Statal
NOR	2005	75	Statal	Statal	Statal
NOR	2006	73	Statal	Statal	Statal
NOR	2007	70	Statal	Statal	Statal
NOR	2008	68	Statal	Statal	Statal
NOR	2009	66	Statal	Statal	Statal
NOR	2010	62	Statal	Statal	Statal
NOR	2011	61	Statal	Statal	Statal
NOR	2012	59	Statal	Statal	Statal
NOR	2013	56	Statal	Statal	Statal
POL	2000	175	Statal	Societal	Private
POL	2001	168	Statal	Societal	Private
POL	2002	158	Statal	Societal	Private
POL	2003	155	Statal	Societal	Private
POL	2004	151	Statal	Societal	Private
POL	2005	147	Statal	Societal	Private
POL	2006	145	Statal	Societal	Private
POL	2007	141	Statal	Societal	Private
POL	2008	137	Statal	Societal	Private
POL	2009	132	Statal	Societal	Private
POL	2010	126	Statal	Societal	Private
POL	2011	122	Statal	Societal	Private
POL	2012	119	Statal	Societal	Private
POL	2013	113	Statal	Societal	Private
PRT	2000	127	Statal	Statal	Statal
PRT	2001	123	Statal	Statal	Statal
PRT	2002	119	Statal	Statal	Statal
PRT	2003	113	Statal	Statal	Statal
PRT	2007	89	Statal	Statal	Statal
PRT	2008	89	Statal	Statal	Statal
PRT	2009	87	Statal	Statal	Statal
PRT	2010	82	Statal	Statal	Statal
PRT	2011	79	Statal	Statal	Statal
PRT	2012	77	Statal	Statal	Statal
PRT	2013	73	Statal	Statal	Statal
SVK	2000	231	Statal	Societal	Private
SVK	2001	222	Statal	Societal	Private
SVK	2002	218	Statal	Societal	Private
SVK	2003	214	Statal	Societal	Private
SVK	2004	205	Statal	Societal	Private
SVK	2005	198	Statal	Societal	Private
SVK	2006	190	Statal	Societal	Private
SVK	2007	188	Statal	Societal	Private
SVK	2008	186	Statal	Societal	Private
SVK	2009	178	Statal	Societal	Private
SVK	2010	170	Statal	Societal	Private
SVN	2000	132	Societal	Societal	Statal
SVN	2001	126	Societal	Societal	Statal
SVN	2002	124	Societal	Societal	Statal
SVN	2003	120	Societal	Societal	Statal
SVN	2004	113	Societal	Societal	Statal
SVN	2005	106	Societal	Societal	Statal
SVN	2006	102	Societal	Societal	Statal
SVN	2007	96	Societal	Societal	Statal
SVN	2008	94	Societal	Societal	Statal
SVN	2009	92	Societal	Societal	Statal
SVN	2010	86	Societal	Societal	Statal
ESP	2000	85	Statal	Statal	Statal
ESP	2001	83	Statal	Statal	Statal
ESP	2002	80	Statal	Statal	Statal
ESP	2003	80	Statal	Statal	Statal
ESP	2004	75	Statal	Statal	Statal
ESP	2005	74	Statal	Statal	Statal
ESP	2006	70	Statal	Statal	Statal
ESP	2007	69	Statal	Statal	Statal
ESP	2008	67	Statal	Statal	Statal
ESP	2009	64	Statal	Statal	Statal
ESP	2010	61	Statal	Statal	Statal
ESP	2011	59	Statal	Statal	Statal
ESP	2012	58	Statal	Statal	Statal
ESP	2013	56	Statal	Statal	Statal
SWE	2000	90	Statal	Statal	Statal
SWE	2001	85	Statal	Statal	Statal
SWE	2002	85	Statal	Statal	Statal
SWE	2003	81	Statal	Statal	Statal
SWE	2004	76	Statal	Statal	Statal
SWE	2005	73	Statal	Statal	Statal
SWE	2006	72	Statal	Statal	Statal
SWE	2007	69	Statal	Statal	Statal
SWE	2008	68	Statal	Statal	Statal
SWE	2009	66	Statal	Statal	Statal
SWE	2010	62	Statal	Statal	Statal
SWE	2011	60	Statal	Statal	Statal
SWE	2012	58	Statal	Statal	Statal
SWE	2013	59	Statal	Statal	Statal
GBR	2001	118	Statal	Statal	Statal
GBR	2002	114	Statal	Statal	Statal
GBR	2003	110	Statal	Statal	Statal
GBR	2004	103	Statal	Statal	Statal
GBR	2005	99	Statal	Statal	Statal
GBR	2006	94	Statal	Statal	Statal
GBR	2007	90	Statal	Statal	Statal
GBR	2008	87	Statal	Statal	Statal
GBR	2009	82	Statal	Statal	Statal
GBR	2010	79	Statal	Statal	Statal
GBR	2011	75	Statal	Statal	Statal
GBR	2012	72	Statal	Statal	Statal
GBR	2013	70	Statal	Statal	Statal

## Sheet: Codebook
Variable name	Variable label
country	Country
year	Year
SDR	All-cause age-standardized amenable mortality rate (per 100,000)
regulation	Type of regulation
financing	Type of financing
provision	Type of provision
